# Supplementary material for: Uncovering the Complexity Mechanism of Different Formulas Treatment for Rheumatoid Arthritis Based on a Novel Network Pharmacology Model
Source: Front Pharmacol. 2020 Jul 10;11:1035. doi: 10.3389/fphar.2020.01035 (PMC7365894; doi:10.3389/fphar.2020.01035)
Supplement: Supplementary file 5 [file Table_4.xlsx]

## Sheet: DSD
SampleGroup	Description
DSD1	Nitrogen metabolism
DSD1	Relaxin signaling pathway
DSD1	AGE-RAGE signaling pathway in diabetic complications
DSD1	Prolactin signaling pathway
DSD1	Endocrine resistance
DSD1	C-type lectin receptor signaling pathway
DSD1	MAPK signaling pathway
DSD1	Pancreatic cancer
DSD1	Kaposi sarcoma-associated herpesvirus infection
DSD1	EGFR tyrosine kinase inhibitor resistance
DSD1	PI3K-Akt signaling pathway
DSD1	HIF-1 signaling pathway
DSD1	Ras signaling pathway
DSD1	Prostate cancer
DSD1	Dopaminergic synapse
DSD1	Proteoglycans in cancer
DSD1	T cell receptor signaling pathway
DSD1	Sphingolipid signaling pathway
DSD1	Fluid shear stress and atherosclerosis
DSD1	Osteoclast differentiation
DSD1	Fc epsilon RI signaling pathway
DSD1	Central carbon metabolism in cancer
DSD1	Epithelial cell signaling in Helicobacter pylori infection
DSD1	ErbB signaling pathway
DSD1	VEGF signaling pathway
DSD1	Yersinia infection
DSD1	Insulin resistance
DSD1	IL-17 signaling pathway
DSD1	TNF signaling pathway
DSD1	Toxoplasmosis
DSD1	Rap1 signaling pathway
DSD1	Chagas disease (American trypanosomiasis)
DSD1	Thyroid hormone signaling pathway
DSD1	Focal adhesion
DSD1	PD-L1 expression and PD-1 checkpoint pathway in cancer
DSD1	Steroid hormone biosynthesis
DSD1	Hepatitis B
DSD1	Ovarian steroidogenesis
DSD1	Arachidonic acid metabolism
DSD1	Acute myeloid leukemia
DSD1	Bladder cancer
DSD1	Neurotrophin signaling pathway
DSD1	Tuberculosis
DSD1	Tryptophan metabolism
DSD1	Toll-like receptor signaling pathway
DSD1	Adherens junction
DSD1	Antifolate resistance
DSD1	Th17 cell differentiation
DSD1	Pertussis
DSD1	Arginine and proline metabolism
DSD1	Measles
DSD1	Non-small cell lung cancer
DSD1	Breast cancer
DSD1	Calcium signaling pathway
DSD1	FoxO signaling pathway
DSD1	Chronic myeloid leukemia
DSD1	ABC transporters
DSD1	Epstein-Barr virus infection
DSD1	Estrogen signaling pathway
DSD1	Salmonella infection
DSD1	Progesterone-mediated oocyte maturation
DSD1	Transcriptional misregulation in cancer
DSD1	Histidine metabolism
DSD1	Shigellosis
DSD1	cAMP signaling pathway
DSD1	Colorectal cancer
DSD1	Adipocytokine signaling pathway
DSD1	Bile secretion
DSD1	Melanoma
DSD1	Platinum drug resistance
DSD1	Th1 and Th2 cell differentiation
DSD1	Apoptosis
DSD1	Serotonergic synapse
DSD1	Autophagy - animal
DSD1	Endometrial cancer
DSD1	Signaling pathways regulating pluripotency of stem cells
DSD1	Choline metabolism in cancer
DSD1	Chemokine signaling pathway
DSD1	Phenylalanine metabolism
DSD1	Hepatocellular carcinoma
DSD1	B cell receptor signaling pathway
DSD1	Platelet activation
DSD1	Non-alcoholic fatty liver disease (NAFLD)
DSD1	Gastric cancer
DSD1	Human cytomegalovirus infection
DSD1	Viral carcinogenesis
DSD1	Cocaine addiction
DSD1	MicroRNAs in cancer
DSD1	Hepatitis C
DSD1	Renal cell carcinoma
DSD1	Longevity regulating pathway
DSD1	NOD-like receptor signaling pathway
DSD1	RIG-I-like receptor signaling pathway
DSD1	Small cell lung cancer
DSD1	Tyrosine metabolism
DSD1	Insulin signaling pathway
DSD1	GnRH signaling pathway
DSD1	Regulation of lipolysis in adipocytes
DSD1	Glioma
DSD1	Leishmaniasis
DSD1	Human T-cell leukemia virus 1 infection
DSD1	Influenza A
DSD1	Inflammatory mediator regulation of TRP channels
DSD1	Cell cycle
DSD1	Longevity regulating pathway - multiple species
DSD1	Mitophagy - animal
DSD1	Human immunodeficiency virus 1 infection
DSD1	Cellular senescence
DSD1	Retinol metabolism
DSD1	JAK-STAT signaling pathway
DSD1	Caffeine metabolism
DSD1	cGMP-PKG signaling pathway
DSD1	Neuroactive ligand-receptor interaction
DSD1	AMPK signaling pathway
DSD1	Metabolism of xenobiotics by cytochrome P450
DSD1	Human papillomavirus infection
DSD1	Alcoholism
DSD1	Arginine biosynthesis
DSD1	Chemical carcinogenesis
DSD1	Glycerolipid metabolism
DSD1	GnRH secretion
DSD1	Inflammatory bowel disease (IBD)
DSD1	Pathogenic Escherichia coli infection
DSD1	Glycolysis / Gluconeogenesis
DSD1	Amphetamine addiction
DSD1	Folate biosynthesis
DSD1	Phospholipase D signaling pathway
DSD2	NF-kappa B signaling pathway
DSD2	Aldosterone-regulated sodium reabsorption
DSD2	African trypanosomiasis
DSD2	Oxytocin signaling pathway
DSD2	Amoebiasis
DSD2	Parathyroid hormone synthesis, secretion and action
DSD2	Long-term depression
DSD2	Vascular smooth muscle contraction
DSD2	Retrograde endocannabinoid signaling
DSD2	Salivary secretion
DSD2	Morphine addiction
DSD2	Fc gamma R-mediated phagocytosis
DSD2	Wnt signaling pathway
DSD2	Circadian entrainment
DSD2	Amyotrophic lateral sclerosis (ALS)
DSD2	Endocrine and other factor-regulated calcium reabsorption
DSD2	Leukocyte transendothelial migration
DSD2	Cholinergic synapse
DSD2	Long-term potentiation
DSD2	p53 signaling pathway
DSD2	Thyroid hormone synthesis
DSD2	Gastric acid secretion
DSD2	PPAR signaling pathway
DSD2	Insulin secretion
DSD2	Gap junction
DSD2	Apoptosis - multiple species
DSD2	GABAergic synapse
DSD2	Aldosterone synthesis and secretion
DSD2	Phosphatidylinositol signaling system
DSD2	Melanogenesis
DSD2	Pancreatic secretion
DSD3	Regulation of actin cytoskeleton
DSD3	Taste transduction
DSD3	Parkinson disease
DSD4	Renin secretion
DSD4	Adrenergic signaling in cardiomyocytes
DSD5	Notch signaling pathway
DSD7	Steroid biosynthesis

## Sheet: GFD
SampleGroup	Description
GFD1	PI3K-Akt signaling pathway
GFD1	EGFR tyrosine kinase inhibitor resistance
GFD1	Relaxin signaling pathway
GFD1	Prostate cancer
GFD1	Central carbon metabolism in cancer
GFD1	Nitrogen metabolism
GFD1	HIF-1 signaling pathway
GFD1	MAPK signaling pathway
GFD1	Ras signaling pathway
GFD1	Steroid hormone biosynthesis
GFD1	Arachidonic acid metabolism
GFD1	Ovarian steroidogenesis
GFD1	Proteoglycans in cancer
GFD1	Acute myeloid leukemia
GFD1	Rap1 signaling pathway
GFD1	Bladder cancer
GFD1	Adherens junction
GFD1	Tryptophan metabolism
GFD1	Antifolate resistance
GFD1	Pancreatic cancer
GFD1	Endocrine resistance
GFD1	AGE-RAGE signaling pathway in diabetic complications
GFD1	Arginine and proline metabolism
GFD1	Breast cancer
GFD1	Prolactin signaling pathway
GFD1	Kaposi sarcoma-associated herpesvirus infection
GFD1	Fluid shear stress and atherosclerosis
GFD1	VEGF signaling pathway
GFD1	ABC transporters
GFD1	Focal adhesion
GFD1	ErbB signaling pathway
GFD1	Insulin resistance
GFD1	Dopaminergic synapse
GFD1	Histidine metabolism
GFD1	Bile secretion
GFD1	Melanoma
GFD1	Estrogen signaling pathway
GFD1	Sphingolipid signaling pathway
GFD1	Gastric cancer
GFD1	T cell receptor signaling pathway
GFD1	C-type lectin receptor signaling pathway
GFD1	Phenylalanine metabolism
GFD1	Transcriptional misregulation in cancer
GFD1	Non-small cell lung cancer
GFD1	Chemokine signaling pathway
GFD1	Longevity regulating pathway
GFD1	PD-L1 expression and PD-1 checkpoint pathway in cancer
GFD1	TNF signaling pathway
GFD1	Cocaine addiction
GFD1	Renal cell carcinoma
GFD1	Serotonergic synapse
GFD1	Small cell lung cancer
GFD1	Hepatocellular carcinoma
GFD1	IL-17 signaling pathway
GFD1	Human cytomegalovirus infection
GFD1	Thyroid hormone signaling pathway
GFD1	Platinum drug resistance
GFD1	Yersinia infection
GFD1	Tyrosine metabolism
GFD1	Regulation of lipolysis in adipocytes
GFD1	Metabolism of xenobiotics by cytochrome P450
GFD1	Chronic myeloid leukemia
GFD1	Endometrial cancer
GFD1	Osteoclast differentiation
GFD1	B cell receptor signaling pathway
GFD1	Chemical carcinogenesis
GFD1	cAMP signaling pathway
GFD1	Hepatitis B
GFD1	Calcium signaling pathway
GFD1	Signaling pathways regulating pluripotency of stem cells
GFD1	Retinol metabolism
GFD1	Epithelial cell signaling in Helicobacter pylori infection
GFD1	Platelet activation
GFD1	MicroRNAs in cancer
GFD1	Glioma
GFD1	Hepatitis C
GFD1	Caffeine metabolism
GFD1	Base excision repair
GFD1	Chagas disease (American trypanosomiasis)
GFD1	Human T-cell leukemia virus 1 infection
GFD1	JAK-STAT signaling pathway
GFD1	Measles
GFD1	Viral carcinogenesis
GFD1	Influenza A
GFD1	Toxoplasmosis
GFD1	Glycerolipid metabolism
GFD1	Colorectal cancer
GFD1	Neuroactive ligand-receptor interaction
GFD1	Arginine biosynthesis
GFD1	Tuberculosis
GFD1	Non-alcoholic fatty liver disease (NAFLD)
GFD1	AMPK signaling pathway
GFD1	Glycolysis / Gluconeogenesis
GFD1	Fc epsilon RI signaling pathway
GFD1	Adipocytokine signaling pathway
GFD1	Drug metabolism - cytochrome P450
GFD1	Cellular senescence
GFD1	Folate biosynthesis
GFD1	cGMP-PKG signaling pathway
GFD1	Apoptosis
GFD1	Glucagon signaling pathway
GFD1	Autophagy - animal
GFD1	Apelin signaling pathway
GFD1	Linoleic acid metabolism
GFD1	Th17 cell differentiation
GFD2	Salivary secretion
GFD2	Cholinergic synapse
GFD2	Adrenergic signaling in cardiomyocytes
GFD2	Gap junction
GFD2	Regulation of actin cytoskeleton
GFD2	Vascular smooth muscle contraction
GFD2	Amphetamine addiction
GFD2	Parkinson disease
GFD2	Renin secretion
GFD2	Synaptic vesicle cycle
GFD2	Taste transduction
GFD2	Morphine addiction
GFD2	Alcoholism
GFD3	GnRH signaling pathway
GFD3	Inflammatory mediator regulation of TRP channels
GFD3	Oxytocin signaling pathway
GFD3	Aldosterone-regulated sodium reabsorption
GFD3	Endocrine and other factor-regulated calcium reabsorption
GFD3	Long-term depression
GFD3	Parathyroid hormone synthesis, secretion and action
GFD3	GnRH secretion
GFD3	Leukocyte transendothelial migration
GFD3	African trypanosomiasis
GFD3	GABAergic synapse
GFD3	Fc gamma R-mediated phagocytosis
GFD3	Circadian entrainment
GFD3	Choline metabolism in cancer
GFD3	Melanogenesis
GFD3	Amoebiasis
GFD3	Long-term potentiation
GFD3	Natural killer cell mediated cytotoxicity
GFD3	Thyroid hormone synthesis
GFD3	Gastric acid secretion
GFD3	Leishmaniasis
GFD3	Phospholipase D signaling pathway
GFD3	Retrograde endocannabinoid signaling
GFD3	Insulin secretion
GFD4	Longevity regulating pathway - multiple species
GFD4	Pentose and glucuronate interconversions
GFD6	Cortisol synthesis and secretion
GFD9	Other glycan degradation
GFD9	Galactose metabolism
GFD9	Sphingolipid metabolism
GFD9	Lysosome
GFD9	Starch and sucrose metabolism
GFD9	Carbohydrate digestion and absorption

## Sheet: HGWD
SampleGroup	Description
HGWD1	Synaptic vesicle cycle
HGWD1	Alcoholism
HGWD1	cAMP signaling pathway
HGWD1	Regulation of lipolysis in adipocytes
HGWD1	Arachidonic acid metabolism
HGWD1	cGMP-PKG signaling pathway
HGWD2	Neuroactive ligand-receptor interaction
HGWD2	Cholinergic synapse
HGWD2	Regulation of actin cytoskeleton
HGWD2	Calcium signaling pathway
HGWD2	Dopaminergic synapse
HGWD2	Cocaine addiction
HGWD3	Nitrogen metabolism
HGWD3	Glycosphingolipid biosynthesis - lacto and neolacto series
HGWD3	Bladder cancer
HGWD4	Prostate cancer
HGWD4	Endocrine resistance
HGWD4	EGFR tyrosine kinase inhibitor resistance
HGWD4	Hepatocellular carcinoma
HGWD4	PI3K-Akt signaling pathway
HGWD4	Breast cancer
HGWD4	Pancreatic cancer
HGWD4	Proteoglycans in cancer
HGWD4	Relaxin signaling pathway
HGWD4	Estrogen signaling pathway
HGWD4	AGE-RAGE signaling pathway in diabetic complications
HGWD4	Gastric cancer
HGWD4	Non-small cell lung cancer
HGWD4	Central carbon metabolism in cancer
HGWD4	Adherens junction
HGWD4	Melanoma
HGWD4	Caffeine metabolism
HGWD4	Focal adhesion
HGWD4	Endometrial cancer
HGWD4	Linoleic acid metabolism
HGWD4	HIF-1 signaling pathway
HGWD4	Acute myeloid leukemia
HGWD4	MAPK signaling pathway
HGWD4	Serotonergic synapse
HGWD4	Ras signaling pathway
HGWD4	Prolactin signaling pathway
HGWD4	Glioma
HGWD4	Kaposi sarcoma-associated herpesvirus infection
HGWD4	Transcriptional misregulation in cancer
HGWD4	ErbB signaling pathway
HGWD4	Fluid shear stress and atherosclerosis
HGWD4	Colorectal cancer
HGWD4	IL-17 signaling pathway
HGWD4	Hedgehog signaling pathway
HGWD4	Cushing syndrome
HGWD4	Human cytomegalovirus infection
HGWD4	MicroRNAs in cancer
HGWD4	Insulin resistance
HGWD4	TNF signaling pathway
HGWD5	Inflammatory mediator regulation of TRP channels
HGWD5	ABC transporters
HGWD5	Vascular smooth muscle contraction
HGWD5	Amphetamine addiction
HGWD5	Fc gamma R-mediated phagocytosis
HGWD5	Aldosterone-regulated sodium reabsorption
HGWD5	African trypanosomiasis
HGWD5	Thyroid hormone signaling pathway
HGWD5	Endocrine and other factor-regulated calcium reabsorption
HGWD5	VEGF signaling pathway
HGWD5	Long-term depression
HGWD5	GnRH secretion
HGWD5	Long-term potentiation
HGWD5	Bile secretion
HGWD5	Thyroid hormone synthesis
HGWD5	Gastric acid secretion
HGWD5	Insulin secretion
HGWD5	Gap junction
HGWD5	GABAergic synapse
HGWD5	Salivary secretion
HGWD5	Morphine addiction
HGWD5	GnRH signaling pathway
HGWD5	Circadian entrainment
HGWD5	Aldosterone synthesis and secretion
HGWD5	Choline metabolism in cancer
HGWD5	Phosphatidylinositol signaling system
HGWD5	Melanogenesis
HGWD5	Pancreatic secretion
HGWD5	Amoebiasis
HGWD5	Parathyroid hormone synthesis, secretion and action
HGWD5	Leukocyte transendothelial migration
HGWD5	Glutamatergic synapse
HGWD5	Sphingolipid signaling pathway
HGWD5	Natural killer cell mediated cytotoxicity
HGWD5	Retrograde endocannabinoid signaling
HGWD5	mTOR signaling pathway
HGWD5	Oxytocin signaling pathway
HGWD5	Wnt signaling pathway
HGWD5	Hepatitis B
HGWD5	Rap1 signaling pathway
HGWD5	Human immunodeficiency virus 1 infection
HGWD5	NF-kappa B signaling pathway
HGWD6	Renin secretion
HGWD6	Adrenergic signaling in cardiomyocytes
HGWD6	Phenylalanine metabolism
HGWD6	Parkinson disease
HGWD6	Histidine metabolism
HGWD6	Taste transduction
HGWD8	Antifolate resistance
HGWD8	Viral carcinogenesis
HGWD9	Folate biosynthesis
HGWD9	Galactose metabolism
HGWD9	Fructose and mannose metabolism
HGWD9	Pentose and glucuronate interconversions
HGWD9	Glycerolipid metabolism
HGWD10	Ovarian steroidogenesis
